# Supplementary material
Source: HighWire-hosted journal article supplement (doi:10.1101/rna.052373.115)
Supplement: SuppFig1_HSQC.pdf [file SuppFig1_HSQC.pdf]

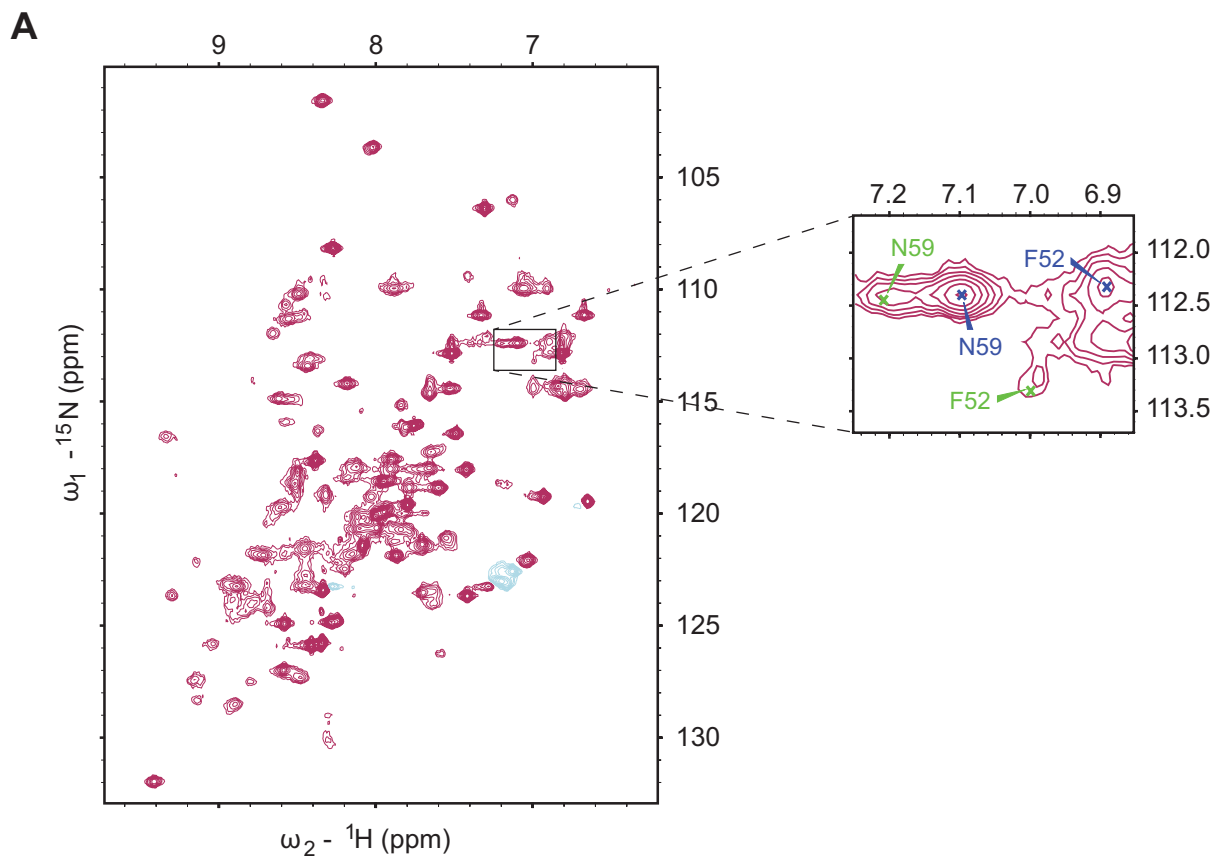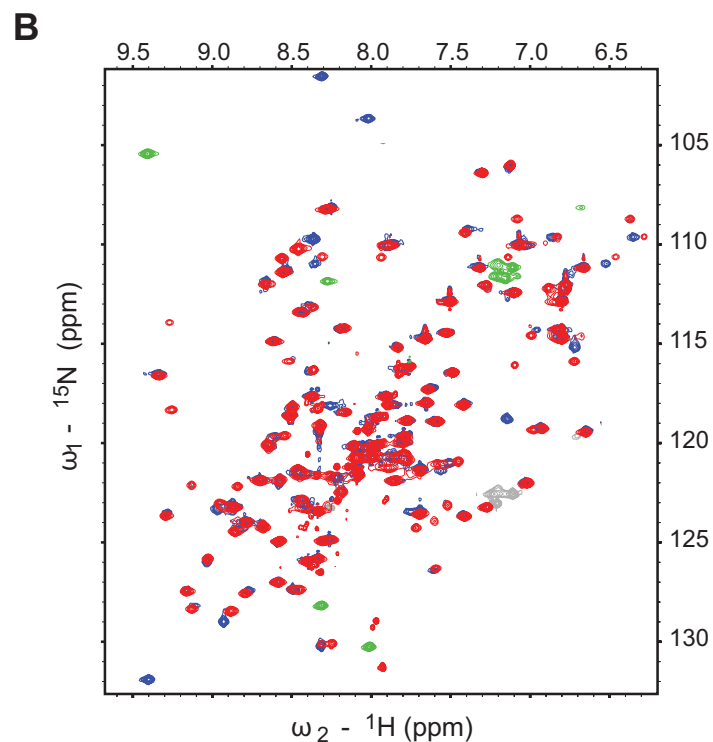

### Supplementary Figure S1.

(A) 2D  ${}^1\text{H}$ - ${}^{15}\text{N}$  HSQC of the RRM in the presence of 0.5 molar equivalents of  $(\text{U})_{11}$  RNA. Expanded view shows the RNA-free conformation labeled in green, bound form in blue. (B) Overlay of  ${}^1\text{H}$ - ${}^{15}\text{N}$  HSQC of the hnRNP C RRM in complex with AUCUUUC (blue & gray contours) and AUUUUUC RNA (red & green).
